# Supplementary material for: Reduction of RGO by BH3: a facile route to partially hydrogenated RGO preparation
Source: Royal Society of Chemistry journal article supplement (doi:10.1039/c4ra01474j), 2014-01-01
Supplement: c4ra01474j1.pdf [file c4ra01474j1.pdf]

## Electronic Supplementary Information

### Reduction of RGO by $\text{BH}_3$ : Facile Route to Partially Hydrogenated RGO Preparation

Miao Zhang,<sup>a</sup> Danyun Xu,<sup>a</sup> Junyi Ji,<sup>a,b</sup> Yuhong Wang,<sup>a</sup> Yang Li,<sup>a</sup> Guoliang Zhang,<sup>a</sup> Fengbao Zhang<sup>a</sup> and Xiaobin Fan\*<sup>a</sup>

*School of Chemical Engineering & Technology, Tianjin University, Tianjin 300072, China.*

\*E-mail: xiaobinfan@tju.edu.cn

#### 1. Raman spectra of RGO and HG

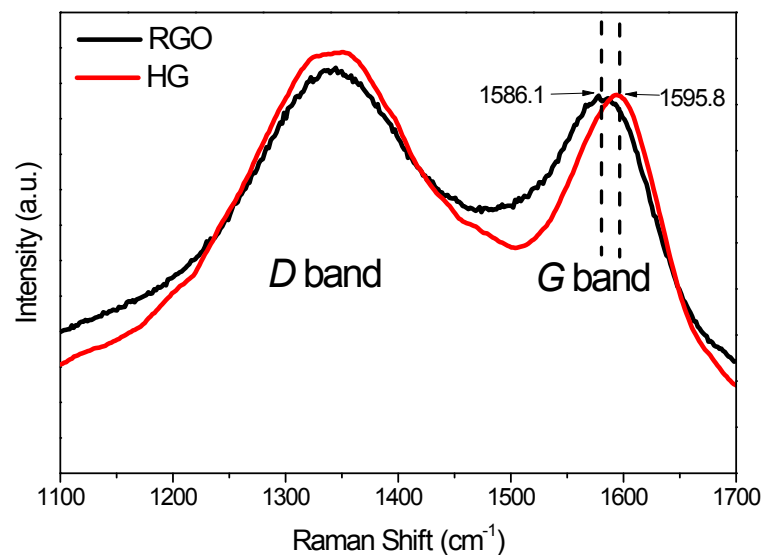

Fig.S1 Raman spectra of RGO and HG

Raman spectroscopy can be a valuable aid in the reduction of RGO. The intensity of the *D* band (at  $\sim 1350 \text{ cm}^{-1}$ ) that concerned with the breathing-like mode slightly increased. Whereas the *G* band (at  $\sim 1580 \text{ cm}^{-1}$ ) related to the in-plane vibrational ( $E_{2g}$ ) mode showed an obvious blue shift ( $\sim 9.7 \text{ cm}^{-1}$ ) after the hydrogenation, which should be assigned to the destruction of the  $\pi$  conjugated system on the carbon basal plane<sup>1</sup> and the transformation of many planar carbon atoms from  $sp^2$  to  $sp^3$ .

#### 2. EELS analysis: double windows method

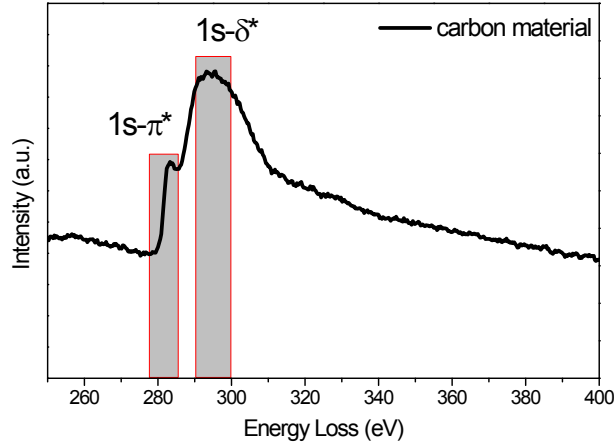

**Fig.S2** EELS spectra of carbon material

The percentage of  $sp^2$  carbon atoms can be given in this formula:

$$\% sp^2 = \left[ \frac{I_{\pi^*}}{I_{(\pi^* + \sigma^*)}} / \left( \frac{I_{\pi^*}}{I_{(\pi^* + \sigma^*)}} \right)_{gr} \right] \times 100\%$$

In the formula,  $I_{\pi^*}$  represents the integral area of intensity with  $\pi^*$  peak as the center, and its energy window is about 5 eV.  $I_{(\pi^* + \sigma^*)}$  represents the integral area of intensity including  $\pi^*$  and  $\sigma^*$  peaks with  $\sigma^*$  peak as the center, and its energy window is about 20 eV. When calculating, we can adjust the width of energy window slightly to make the results more accurate. The index of  $gr$  represents a kind of material with 100-percent  $sp^2$  hybridized atoms, for example ideal monocrystal graphite. The grey rectangle represents the tunable energy window.

### 3. The theoretical calculation of the surface density

On average, there are two carbon atoms in every hexagonal ring, whose weight is  $m=24/N_A$

$$\text{Area of hexagon: } S=3\sqrt{3}a^2/2=2.6 \times (142 \times 10^{-12})^2 \text{ m}^2=5.24 \times 10^{-20} \text{ m}^2$$

$$\text{So the carbon weight in per square meter is: } 24 / (5.24 \times 10^{-20} N_A) \text{ g m}^{-2}=0.76 \text{ mg m}^{-2}$$

The same procedure applied to HG gives a value of  $0.66 \text{ mg m}^{-2}$ . The detailed calculations were as follows:

Two carbon atoms in every hexagon on average, whose weight is  $m=24/N_A$

$$\text{Area of hexagon: } S=3\sqrt{3}a^2/2=2.6 \times (152 \times 10^{-12})^2 \text{ m}^2=5.24 \times 10^{-20} \text{ m}^2$$

$$\text{So the carbon weight in per square meter is: } 24 / (5.24 \times 10^{-20} N_A) \text{ g m}^{-2}=0.66 \text{ mg m}^{-2}$$

In theory, we can conclude the decrease in the density of graphene after hydrogenation. And this result is consistent with the EELS spectra.

### 4. The X-ray Photoelectron Spectroscopy of hydrogenated graphene

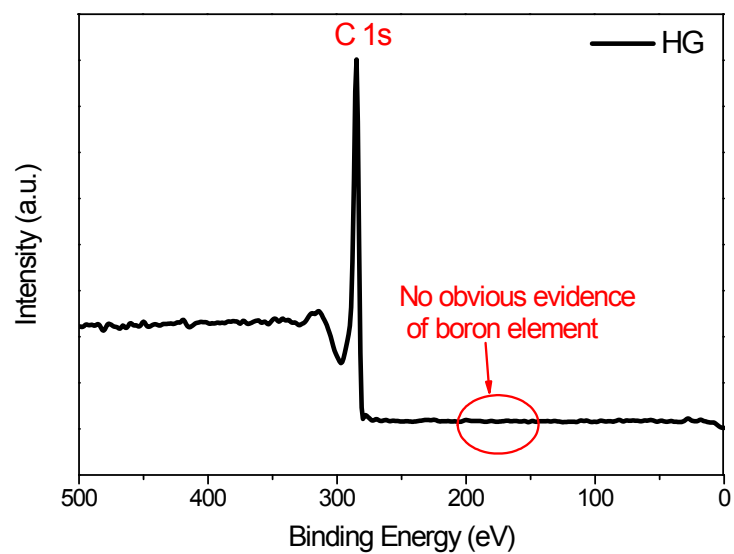

**Fig.S3** XPS spectra of hydrogenated graphene

The element of boron shows peaks among 185–200 eV in X-ray Photoelectron Spectroscopy. Shown as Fig.S3, there is no obvious evidence of element boron after hydrolysis and this indicates the boron has been removed.

## Reference

1. Y. Li, H. Y. Chen, L. Y. Voo, J. Y. Ji, G. H. Zhang, G. L. Zhang, F. B. Zhang and X. B. Fan, *J. Mater. Chem.*, 2012, **22**, 15021-15024.
